# Supplementary material for: Zinc Levels Modulate Lifespan through Multiple Longevity Pathways in Caenorhabditis elegans
Source: PubMed Central journal article supplement (PMC4831763; doi:10.1371/journal.pone.0153513), 2016-04-14

# Supplementary Figure 6

A

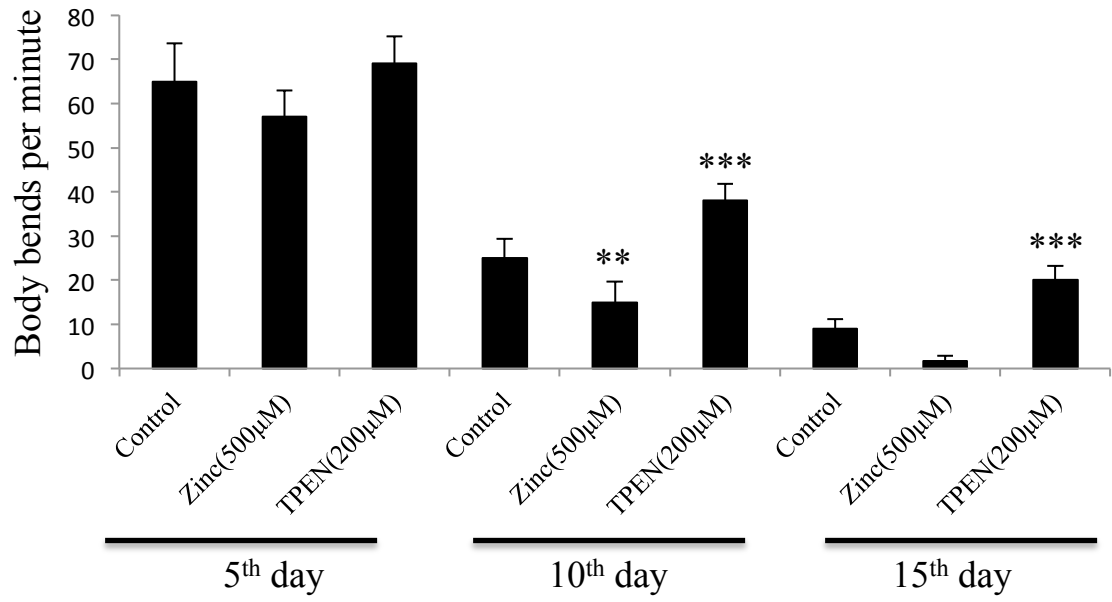

B

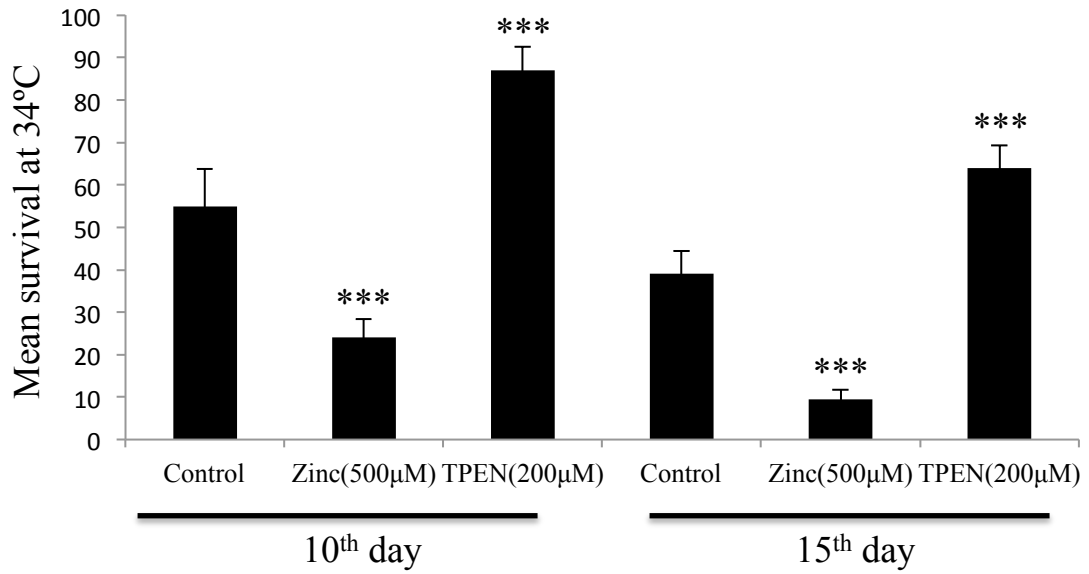

Supplement: pone.0153513.s006.pdf [file pone.0153513.s006.pdf]
