# Supplementary material for: Zinc Levels Modulate Lifespan through Multiple Longevity Pathways in Caenorhabditis elegans
Source: PubMed Central journal article supplement (PMC4831763; doi:10.1371/journal.pone.0153513), 2016-04-14
Supplement: pone.0153513.s008.pdf [file pone.0153513.s008.pdf]

## Supplementary Table 1

| <b>Genotype</b>       | <b>Condition</b>    | <b>Mean life span <math>\pm</math>S.D (days)</b> | <b>N, number of worm</b> |
|-----------------------|---------------------|--------------------------------------------------|--------------------------|
| Wild type             | Control             | 16.7 $\pm$ 0.86                                  | 207                      |
|                       | Znso4 (500 $\mu$ M) | 14.3 $\pm$ 0.42                                  | 328                      |
|                       | TPEN (200 $\mu$ M)  | 22.9 $\pm$ 1.06                                  | 249                      |
| <i>daf-16(mu86)</i>   | Control             | 12.0 $\pm$ 0.33                                  | 350                      |
|                       | Znso4 (500 $\mu$ M) | 12.0 $\pm$ 0.18                                  | 277                      |
|                       | TPEN (200 $\mu$ M)  | 15.6 $\pm$ 0.34                                  | 274                      |
| <i>hsf-1(sy441)</i>   | Control             | 13.4 $\pm$ 0.11                                  | 226                      |
|                       | Znso4 (500 $\mu$ M) | 12.6 $\pm$ 0.45                                  | 235                      |
|                       | TPEN (200 $\mu$ M)  | 16.5 $\pm$ 0.49                                  | 222                      |
| <i>nhr-49(ok2165)</i> | Control             | 13.3 $\pm$ 0.16                                  | 234                      |
|                       | Znso4 (500 $\mu$ M) | 11.7 $\pm$ 0.04                                  | 227                      |
|                       | TPEN (200 $\mu$ M)  | 18.5 $\pm$ 0.16                                  | 276                      |
| <i>rsk-1(ok1255)</i>  | Control             | 19.45 $\pm$ 0.30                                 | 235                      |
|                       | Znso4 (500 $\mu$ M) | 17.2 $\pm$ 0.24                                  | 261                      |
|                       | TPEN (200 $\mu$ M)  | 24.7 $\pm$ 0.18                                  | 242                      |
| <i>aak-2(ok524)</i>   | Control             | 15.9 $\pm$ 0.11                                  | 224                      |
|                       | Znso4 (500 $\mu$ M) | 13.8 $\pm$ 0.04                                  | 251                      |
|                       | TPEN (200 $\mu$ M)  | 19.5 $\pm$ 0.85                                  | 298                      |
| <i>skn-1 (eu31)</i>   | Control             | 14.9 $\pm$ 0.37                                  | 255                      |
|                       | Znso4 (500 $\mu$ M) | 14.6 $\pm$ 0.31                                  | 282                      |
|                       | TPEN (200 $\mu$ M)  | 17.7 $\pm$ 0.62                                  | 243                      |
| <i>clk-1(2519)</i>    | Control             | 19.5 $\pm$ 0.16                                  | 267                      |
|                       | Znso4 (500 $\mu$ M) | 16.8 $\pm$ 0.79                                  | 245                      |
|                       | TPEN (200 $\mu$ M)  | 25.9 $\pm$ 0.30                                  | 229                      |
